# Supplementary material for: Non-compacted, PET-insensitive amyloid states increase after systemic inflammation and predict neuritic damage across Aβ pathology models and Alzheimer patients
Source: Research Square preprint supplement (doi:10.21203/rs.3.rs-8269406/v1), 2026-01-13
Supplement: Supplementary file 1 [file d04dab08ecb2743463bc47c1.xlsx]

## Sheet: Sheet1
Age	Sex	Case	Brain_region	plaque_number
70	female	sAD	Frontal	66
80	female	sAD	Frontal	47
81	female	sAD	Frontal	12
62	male	sAD	Frontal	35
67	male	sAD	Frontal	33
70	male	sAD	Frontal	56
47	female	PSEN1_Intron4	Frontal	58
51	female	PSEN1_Intron4	Frontal	46
51	male	PSEN1_Intron4	Frontal	81
56	female	APP_V717I	Frontal	83
62	male	APP_V717I	Frontal	98
66	male	APP_V717I	Frontal	41
64	female	R47H_TREM2	Frontal	32
66	female	R47H_TREM2	Frontal	20
41	female	PSEN1_TREM2	Frontal	79
